# Supplementary material
Source: ML conference proceedings conference paper supplement (https://openaccess.thecvf.com/content/CVPR2023/html/Bao_DexArt_Benchmarking_Generalizable_CVPR_2023_paper.html)
Supplement: Supplementary file 3 [file Bao_DexArt_Benchmarking_Generalizable_CVPR_2023_supplemental.zip]

Archive with 10 entries (7 files):
- Supp/DexArtSupp.mp4
- Supp/_CVPR_2023__DexArt_Supp_.pdf
- __MACOSX/Supp/
- __MACOSX/
- Supp/
- __MACOSX/._Supp
- __MACOSX/Supp/.__CVPR_2023__DexArt_Supp_.pdf
- Supp/.DS_Store
- __MACOSX/Supp/._.DS_Store
- __MACOSX/Supp/._DexArtSupp.mp4
